# Supplementary material
Source: publisher figshare collection journal article supplement (https://gsajournals.figshare.com/ndownloader/files/11484122)
Supplement: Supplementary file 1 [file 11484122]

**Supplemental Table S2.** Number of significant1, differentially expressed genes for each bacteriocyte comparison.

|  | **ABAC vs. FBAC** | **BAC vs. BODY** |
| --- | --- | --- |
| **Up-regulated** | 159 | 1,904 |
| **Down-regulated** | 103 | 4,211 |

ABAC and FBAC denote bacteriocytes of aphid lines feeding on alfalfa and fava, respectively. BAC and BODY denote bacteriocytes and body cells of both aphid lines feeding on alfalfa and fava, respectively. ABAC and FBAC have three biological replicates. BAC and BODY have 6 biological replicates. 1FDR corrected p-value < 0.05, normalized read count values > 1.5x for BAC vs. BODY; FDR corrected p-value <0.1 for ABAC vs. FBAC
